# Supplementary material
Source: MDPI journal article supplement (https://www.mdpi.com/2073-4441/10/6/715)
Supplement: s1 [file s1]

## Supplementary information

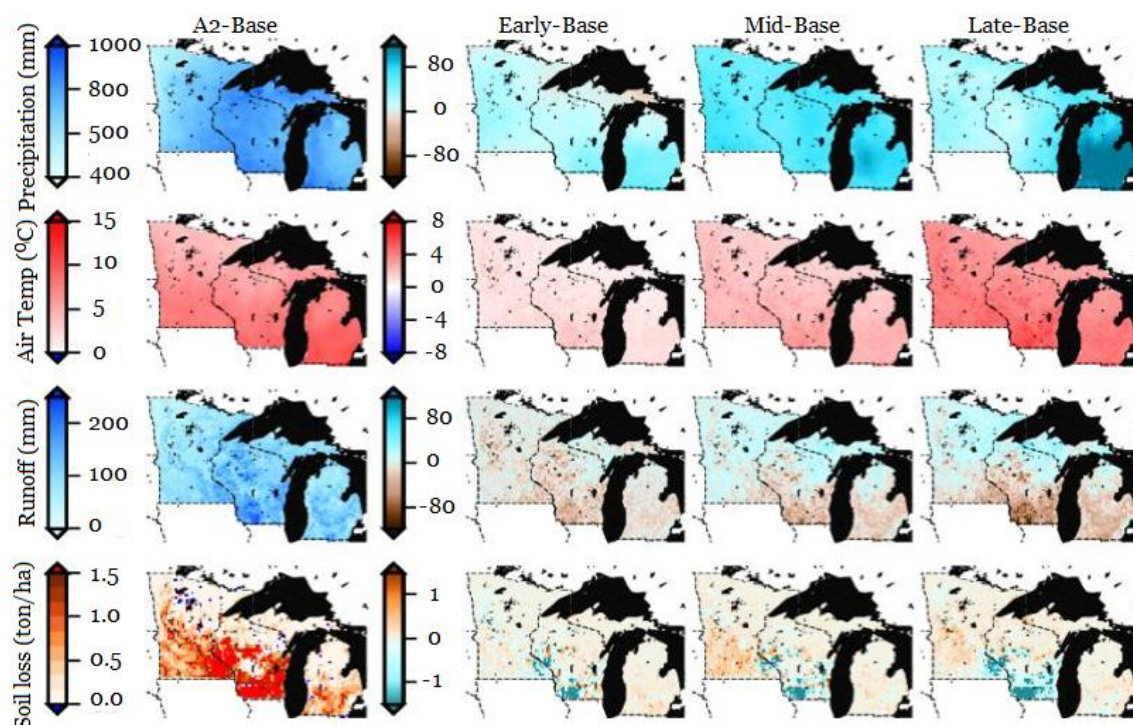

**Figure S1.** Predicted average annual precipitation, air temperature, runoff, and soil loss results (base value, and differences between early century, middle century, and late century periods and base period) under A2 scenario for the Great Lakes region.

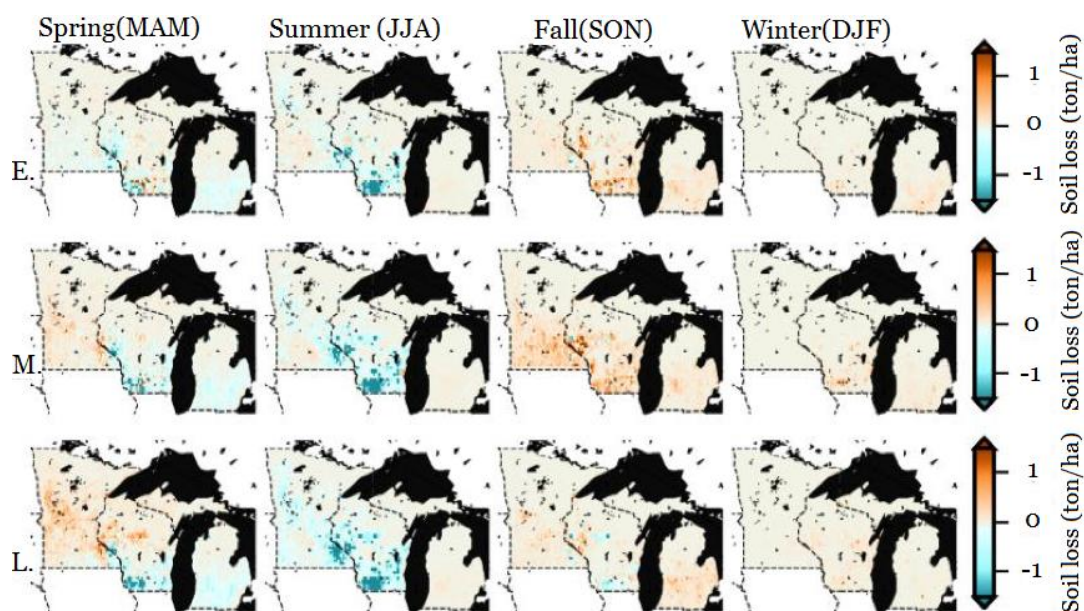

**Figure S2.** Predicted seasonal soil loss results under A2 scenario for the Great Lakes region.
